# Supplementary material for: COVID-19 Vaccine Perceptions among Ebola-Affected Communities in North Kivu, Democratic Republic of the Congo, 2021
Source: MDPI journal article supplement (doi:10.3390/vaccines11050973), 2023-05-11
Supplement: s1 [file s1]

**Supplemental Figure S1.** Map of health zones (Beni, Butembo, Mabalako) surveyed in North Kivu, The Democratic Republic of the Congo, 2021.

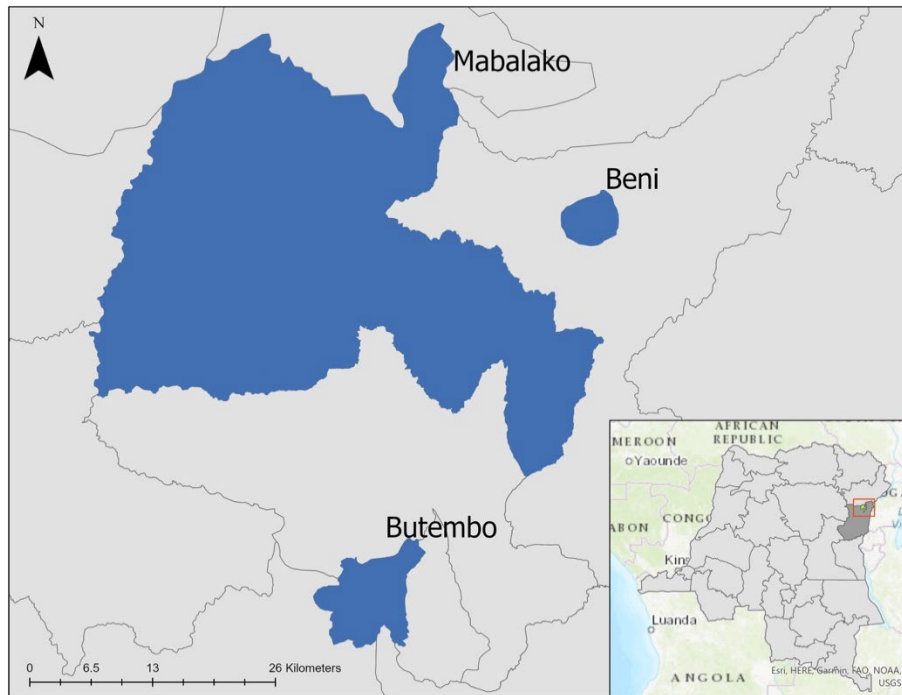

**Supplemental Figure S2. Survey flow diagram.**

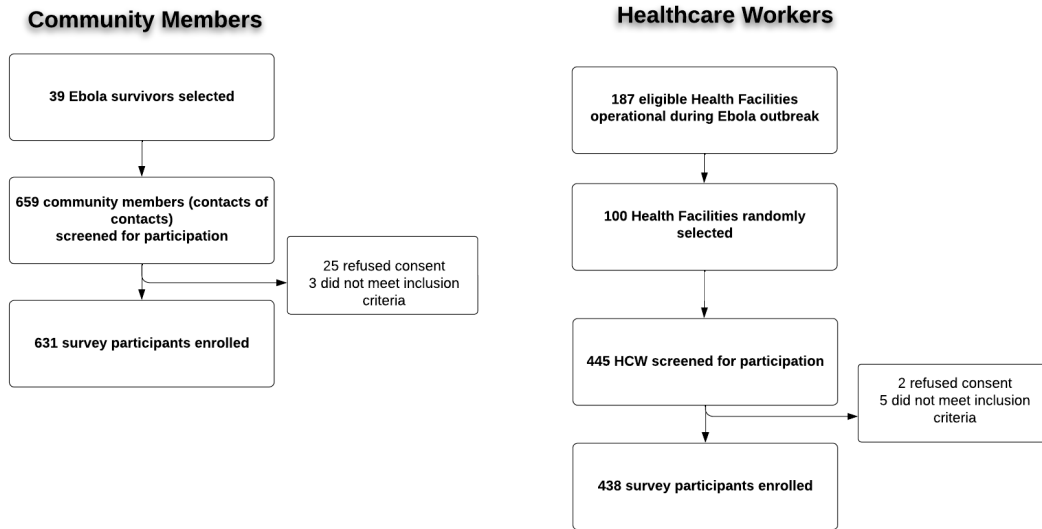

**Supplemental Table S1.** Perceptions regarding COVID-19 vaccines among community members (CMs; N=631) and healthcare workers (HCWs; N=438), North Kivu, The Democratic Republic of the Congo, 2021.

| Questionnaire Item                                                                                      | Group | Strongly Agree<br>n (%)<br>[95% CI] <sup>1</sup> | Agree                      | Neutral                   | Disagree                   | Strongly Disagree          | Unsure/<br>Decline        |
|---------------------------------------------------------------------------------------------------------|-------|--------------------------------------------------|----------------------------|---------------------------|----------------------------|----------------------------|---------------------------|
| A COVID-19 vaccine is needed in addition to barrier measures to stop the spread of COVID-19             | CMs   | 136 (21.6)                                       | 103 (16.3)                 | 118 (18.7)                | 92 (14.6)                  | 75 (11.9)                  | 107 (17)                  |
|                                                                                                         | HCWs  | 101 (23.1)<br>[20.72, 5.6]                       | 110 (25.1)<br>[23.1, 27.3] | 45 (10.3)<br>[8.9, 11.8]  | 89 (20.3)<br>[18.2, 22.6]  | 45 (10.3)<br>[8.9, 11.8]   | 48 (11.0)<br>[9.4, 12.7]  |
| Once vaccinated we do not need barrier measures                                                         | CMs   | 19 (3.0)                                         | 25 (4.0)                   | 71 (11.3)                 | 206 (32.7)                 | 214 (33.9)                 | 96 (15.2)                 |
|                                                                                                         | HCWs  | 6 (1.4)<br>[0.9, 2.1]                            | 8 (1.8)<br>[1.3, 2.6]      | 19 (4.3)<br>[3.5, 5.4]    | 179 (40.9)<br>[38.0, 43.8] | 190 (43.4)<br>[40.5, 46.3] | 36 (8.2)<br>[6.8, 9.9]    |
| Barrier measures are sufficient. A vaccine is not needed                                                | CMs   | 69 (10.9)                                        | 70 (11.1)                  | 93 (14.7)                 | 167 (26.5)                 | 139 (22.0)                 | 93 (14.7)                 |
|                                                                                                         | HCWs  | 43 (9.8)<br>[8.5, 11.3]                          | 55 (12.6)<br>[10.9, 14.4]  | 45 (10.3)<br>[8.9, 11.9]  | 141 (32.2)<br>[29.8, 34.7] | 123 (28.1)<br>[25.4, 30.9] | 31 (7.1)<br>[5.9, 8.5]    |
| A COVID-19 vaccine should be given to people who are more at risk for severe illness, only <sup>2</sup> | CMs   | 27 (4.3)                                         | 48 (7.6)                   | 108 (17.1)                | 177 (28.1)                 | 153 (24.3)                 | 118 (18.7)                |
|                                                                                                         | HCWs  | 13 (3.0)<br>[2.2, 4.0]                           | 33 (7.5)<br>[6.2, 9.1]     | 65 (14.8)<br>[12.8, 17.2] | 135 (30.8)<br>[28.4, 33.4] | 136 (31.1)<br>[28.1, 34.1] | 56 (12.8)<br>[11.0, 14.8] |
| A COVID-19 vaccine should be given to everyone, not just those who are more at risk for severe illness  | CMs   | 174 (27.6)                                       | 114 (18.1)                 | 108 (17.1)                | 74 (11.7)                  | 61 (9.7)                   | 100 (15.6)                |
|                                                                                                         | HCWs  | 152 (34.7)<br>[31.6, 38.0]                       | 111 (25.3)<br>[23.1, 27.7] | 48 (11.0)<br>[9.1, 13.1]  | 46 (10.5)<br>[9.1, 12.0]   | 27 (6.2)<br>[5.1, 7.4]     | 54 (12.3)<br>[10.8, 14.1] |

<sup>1</sup> 95% CI presented for HCWs as survey methods were used for HCW data analysis based on health facility clustering.

<sup>2</sup> For example: elderly, health and other essential workers, people with chronic health conditions etc.

**Supplemental Table S2.** General vaccine confidence among community members (N=631) and healthcare workers (N=438), North Kivu, The Democratic Republic of the Congo, 2021.

| Item                                                                          | Respondent Group | Very much                  | Somewhat                   | Very Little<br>n(%)<br>[95% CI]* | Not At All             | Unsure / Declined           |
|-------------------------------------------------------------------------------|------------------|----------------------------|----------------------------|----------------------------------|------------------------|-----------------------------|
| How much do you think that vaccines are good?                                 | CM               | 240 (38.0)                 | 220 (34.9)                 | 72 (11.4)                        | 40 (6.3)               | 59 (9.4)                    |
|                                                                               | HCW              | 258 (58.9)<br>[55.7, 62.1] | 130 (29.7)<br>[27.1, 32.4] | 27 (6.2)<br>[5.1, 7.4]           | 7 (1.6)<br>[1.1, 2.4]  | 16 (3.7)<br>[2.8, 4.8]      |
| How much do you think that vaccines are safe?                                 | CM               | 170 (26.9)                 | 209 (33.1)                 | 33 (21.1)                        | 54 (8.6)               | 65 (10.3)                   |
|                                                                               | HCW              | 190 (43.4)<br>[40.5, 46.3] | 168 (38.4)<br>[35.8, 41.0] | 36 (8.2)<br>[6.9, 9.7]           | 17 (3.9)<br>[3.0, 5.0] | 27 (6.2)<br>[5.0, 7.5]      |
| How much do you think that vaccines protect against diseases?                 | CM               | 255 (40.4)                 | 233 (36.9)                 | 77 (12.2)                        | 25 (4.0)               | 41 (6.5)                    |
|                                                                               | HCW              | 256 (58.4)<br>[55.5, 61.3] | 129 (29.5)<br>[27.0, 32.0] | 27 (6.2)<br>[5.1, 7.5]           | 14 (3.2)<br>[2.4, 4.2] | 12 (2.7)<br>[2.1, 3.6]      |
| To which extent do religious leaders in your community approve of vaccination | CM               | 314 (49.8)                 | 154 (24.4)                 | 50 (7.9)                         | 14 (2.2)               | 99 (15.7)                   |
|                                                                               | HCW              | 236 (53.9)<br>[50.8, 56.9] | 106 (24.2)<br>[21.9, 26.7] | 25 (5.7)<br>[4.3, 7.5]           | 14 (3.2)<br>[2.4, 4.2] | 57 (13.0)<br>[10.9, 15.5]   |
| How much do other leaders in this community approve of vaccination?           | CM               | 290 (46.0)                 | 186 (29.5)                 | 42 (6.7)                         | 17 (2.7)               | 96 (15.2)                   |
|                                                                               | HCW              | 228 (52.1)<br>[49.1, 55.0] | 118 (26.9)<br>[24.6, 29.3] | 21 (4.8)<br>[3.8, 6.0]           | 11 (2.5)<br>[1.9, 3.4] | 60 (13.7)<br>[11.4, 16.4]   |
|                                                                               |                  | <b>Positively</b>          | <b>Mixed</b>               | <b>Negatively</b>                | <b>-</b>               | <b>Don't Know/ Declined</b> |
| How do people in this community usually speak about vaccination?              | CM               | 84 (13.3)                  | 354 (56.1)                 | 136 (21.6)                       | -                      | 57 (9.0)                    |
|                                                                               | HCW              | 45 (10.3)<br>[8.5, 12.3]   | 267 (61.0)<br>[58.2, 63.7] | 109 (24.9)<br>[22.5, 27.5]       | -                      | 17 (3.9)<br>[3.0, 4.9]      |
| Median [IQR]                                                                  |                  |                            |                            |                                  |                        |                             |
| Total Vaccine Confidence Composite Score                                      | CMs              |                            |                            | 12 [9–15]                        |                        |                             |
|                                                                               | HCWs             |                            |                            | 14 [11–16]                       |                        |                             |

**Supplemental Table S3.** Information important for vaccine-related decisions among community members (CMs) and healthcare workers (HCWs), North Kivu, The Democratic Republic of the Congo, 2021.

|                                                                                        | CMs          |      | HCWs         |                         |
|----------------------------------------------------------------------------------------|--------------|------|--------------|-------------------------|
|                                                                                        | n<br>(N=631) | %    | n<br>(N=438) | % (95% CI) <sup>1</sup> |
| <b>What information is important to help you decide to get vaccinated?<sup>2</sup></b> |              |      |              |                         |
| Side Effects                                                                           | 285          | 45.2 | 209          | 47.7 (44.4, 51.0)       |
| Cost                                                                                   | 25           | 4.0  | 22           | 94.9 (93.7, 96.0)       |
| Location where vaccine is offered                                                      | 117          | 18.5 | 96           | 21.9 (19.6, 24.4)       |
| Vaccine efficacy                                                                       | 404          | 64.0 | 318          | 72.6 (69.8, 75.2)       |
| Eligibility information                                                                | 201          | 31.9 | 209          | 47.7 (44.4, 51.0)       |

<sup>1</sup> 95% CI presented for HCWs as survey methods used for HCW data analysis

<sup>2</sup> Multiple selections allowed therefore proportions do not sum to 100%

Abbreviations: CI, confidence interval
